# Supplementary material for: A new species and range extensions for three other species of pebblesnails (Lithoglyphidae, Fluminicola) from the upper Klamath basin, California–Oregon
Source: Zookeys. 2019 Jan 3;(812):47–67. doi: 10.3897/zookeys.812.29205 (PMC6328529; doi:10.3897/zookeys.812.29205)
Supplement: Supplementary material 2 [file zookeys-812-047-s002.xlsx]

## Sheet: Haplotype
F. klamathensis sp. n.
Haplotype	UKL 19	UKL 24	UKL26/27	UKL 33	UKL 41	UKL 47	UKL 61	UKL 78	UKL 80/81	UKL 86
I (UKL19B)	2
II (UKL24A)		1	1
III (UKL24B)		2
IV (UKL24D)		1
V (UKL27A)			2							1
VI (UKL33B)				1
VII (UKL41C)					1
VIII (UKL41D)					1
IX (UKL47C)						1
X (UKL61B)							1
XI (UKL61C)							1
XII (UKL78D)								2
XIII (UKL80A)									1
XIV (UKL80B)									1	2
XV (UKL80C)									1
XVI (UKL86B)										1
N	2	4	3	1	2	1	2	2	3	4	24
UKL F. modoci
Haplotype	UKL 12	UKL 13	UKL14/15	UKL 17	UKL 19	UKL 21	UKL 22	UKL 31/32	UKL 33	UKL 35	UKL 37	UKL 38	UKL 39	UKL 40	UKL 41	UKL 42	UKL 43	UKL 44	UKL 46	UKL 47	UKL 48	UKL 61	UKL 79	UKL 84/85
I (UKL12A)	1		2			2				2
II (UKL12B)	2
III (UKL12D)	1
IV (UKL13A)		3	1	4	1		4	4	1	1	4	2								1			2	7
V (UKL13D)		1
VI (UKL15A)			1
VII (UKL15E)			3
VIII (UKL15F)			1
IX (UKL17A)				1
X (UKL19A)					1
XI (UKL21B)						1
XII (UKL31B)								1
XIII (UKL32C)								1
XIV (UKL38B)												1
XV (UKL39A)													1
XVI (UKL39B)													2
XVII (UKL40A)														2
XVIII (UKL40B)														1
XIX (UKL41A)															2	4				2			1
XX (UKL43A)																	3
XXI (UKL44A)																		3
XXII (UKL44C)																		1
XXIII (UKL44E)																		1
XXIV (UKL46A)																			4
XXV (UKL48A)																					4
XXVI (UKL61A)																						1
XXVII (UKL61D)																						1
N	4	4	8	5	2	3	4	6	1	3	4	3	3	3	2	4	3	5	4	3	4	2	3	7	90
UKL F. multifarius
Haplotype	UKL 16	UKL 18	UKL20	UKL 23	UKL 28	UKL 29	UKL 30	UKL 32	UKL 34	UKL 36	UKL 45	UKL 49	UKL 50/51/52	UKL 53/54	UKL 55/56	UKL 57	UKL 58/59/60	UKL 62	UKL 63	UKL 64	UKL 65	UKL 66	UKL 67	UKL 68	UKL 69	UKL 70	UKL 71	UKL 72	UKL 73/74	UKL 75	UKL 76	UKL 77	UKL 82	UKL 83/84	UKL 87/88	UKL 89	UKL 90	UKL 91
I (UKL16A)	1
II (UKL16E)	4
III (UKL18A)		2			4				4										5	6	1					1			2			4
IV (UKL18C)		2
V (UKL20A)			2
VI (UKL20C)			2	3		4	4	1		4																								4
VII (UKL23C)				1
VIII (UKL45A)											2
IX (UKL45D)											1
X (UKL49A)												1
XI (UKL49B)												3
XII (UKL50A)													2	1
XIII (UKL50B)													1
XIV (UKL50C)													1
XV (UKL51A)													4
XVI (UKL52A)													1
XVII (UKL52B)													1				2
XVIII (UKL52C)													1
XIX (UKL52D)													1	1
XX (UKL53A)														4		1																				2
XXI (UKL54B)														1		1																	1		3		1
XXII (UKL54D)														1			2
XXIII (UKL55A)															7
XXIV (UKL55C)															1
XXV (UKL57A)																1
XXVI (UKL58A)																	3																1
XXVII (UKL58D)																	1
XXVIII (UKL59A)																	1
XXIX (UKL59C)																	1
XXX (UKL62A)																		4
XXXI (UKL65A)																					2	1
XXXII (UKL66A)																						3	2		4
XXXIII (UKL67B)																							2
XXXIV (UKL68A)																								1
XXXV (UKL68B)																								1
XXXVI (UKL70A)																										1
XXXVII (UKL71B)																											1
XXXVIII (UKL71C)																											2
XXXIX (UKL71D)																											1
XL (UKL72A)																												4
XLI (UKL73A)																													2
XLII (UKL74A)																													4
XLIII (UKL75A)																														4
XLIV (UKL76A)																															4
XLV (UKL82C)																																	1
XLVI (UKL87A)																																			2
XLVII (UKL87C)																																			1
XLVIII (UKL88A)																																			1
XLIX (UKL90A)																																					1
L (UKL91A)																																						1
LI (UKL91B)																																						1
N	5	4	4	4	4	4	4	1	4	4	3	4	12	8	8	3	10	4	5	6	3	4	4	2	4	2	4	4	8	4	4	4	3	4	7	2	2	2	168
